# Supplementary material for: Nitrogen solubility in odontocete blubber and mandibular fats in relation to lipid composition
Source: Oxford University Press journal article supplement (doi:10.1242/jeb.122606), 2015-08-01
Supplement: jeb122606supp.pdf [file jeb122606supp.pdf]

## SUPPLEMENTARY MATERIAL

**Table S1. Summary of specimens, including scientific name, species abbreviations, stranding ID, age class (with total length in cm), sex and locations of tissues obtained.** Not shown is (Ss) *Sus scrofa domesticus* – domesticated pig back fat, which was obtained courtesy of Harris Teeter, Wilmington, NC.

| Scientific Name                   | Common Name               | Species Code | ID#                   | Life History Category<br>(Total Length) | Sex    | Fat Samples          |       |       |
|-----------------------------------|---------------------------|--------------|-----------------------|-----------------------------------------|--------|----------------------|-------|-------|
|                                   |                           |              |                       |                                         |        | Blubber <sup>†</sup> | IMFB  | EMFB  |
| <i>Physeter macrocephalus</i>     | sperm whale               | Pm           | CAHA142               | Adult (1022 cm)                         | Female | Thoracic             | Right | Right |
| <i>Kogia breviceps</i>            | pygmy sperm whale         | Kb           | KLC078                | Adult (316 cm)                          | Female | Thoracic             | Right | Right |
|                                   |                           |              | KLC135                | Adult (252.5 cm)                        | Female | Nuchal               | Left  | Right |
|                                   |                           |              | SWT009                | Adult (328.5 cm)                        | Male   | Thoracic             | Right | Right |
| <i>Mesoplodon densirostris</i>    | Blainville's beaked whale | Md           | NCARI020              | NA (399 cm)                             | Male   | Thoracic             | Right | Right |
| <i>Mesoplodon europaeus</i>       | Gervais' beaked whale     | Me           | NA*                   | NA (NA)                                 | NA     | Nuchal               | Left  | Left  |
| <i>Monodon monoceros</i>          | narwhal                   | Mm           | STR15146              | Adult (NA)                              | Male   | NA                   | NA    | Left  |
| <i>Stenella frontalis</i>         | Atlantic spotted dolphin  | Sf           | CAHA127 <sup>††</sup> | Adult (209.5 cm)                        | Female | Thoracic             | Right | Right |
|                                   |                           |              | CAHA126 <sup>††</sup> | NA (203 cm)                             | Female | Thoracic             | Right | Right |
|                                   |                           |              | CAHA122 <sup>††</sup> | Adult (228 cm)                          | Male   | Thoracic             | Right | Right |
| <i>Globicephala macrorhynchus</i> | short-finned pilot whale  | Gm           | RT49**                | Adult (375 cm)                          | Female | Thoracic             | Right | Right |
|                                   |                           |              | RT105**               | Adult (375 cm)                          | Female | Thoracic             | Right | Right |
|                                   |                           |              | RT106**               | Adult (368 cm)                          | Female | Thoracic             | Right | Right |

<sup>†</sup>Thoracic and nuchal blubber have been shown to exhibit negligible differences in lipid composition (H. Koopman, pers. comm./unpublished data).

\*This animal did not have any stranding data, but was genetically identified as *M. europaeus*.

††These three *S. frontalis* animals were part of the same mass stranding event on 31 October 2012 off Cape Hatteras, NC.

\*\*These three *G. macrorhynchus* animals were part of the same mass stranding event on 15-16 January 2005 (Hohn et al., 2006).

## REFERENCES

**Hohn, A. A., Rotstein, D. S., Harms, C. A. and Southall, B. L.** (2006). “Report on Marine Mammal Unusual Mortality Event UMESE0501Sp: Multispecies Mass Stranding of Pilot Whales (*Globicephala macrorhynchus*), Minke Whale (*Balaenoptera acutorostrata*), and Dwarf Sperm Whales (*Kogia sima*) in North Carolina on 15-16 January 2005.” US Department of Commerce, NOAA and National Marine Fisheries Service, March 2006.

**Table S2. Percentages (mol% of total FA/FAIc profile, including both TAG and WE lipid components) of major FAs and FAIcs constituting pig back fat and blubber from odontocetes examined in this study.** Components that did not constitute more than 1.0 mol% of any one sample are excluded. For specimens with n>1, the mean with standard deviation is reported.

| <b>Lipid Component</b>       | <b>Ss</b> | <b>Pm</b> | <b>Kb*</b> | <b>Md</b> | <b>Me</b> | <b>Sf</b>  | <b>Gm</b>  |
|------------------------------|-----------|-----------|------------|-----------|-----------|------------|------------|
| <b>TAG FA <i>i</i>-5:0</b>   | 0.0       | 0.0       | 0.0        | 0.0       | 0.0       | 5.2 ± 0.4  | 0.7 ± 0.1  |
| <b>TAG FA <i>i</i>-10:0</b>  | 0.0       | <0.1      | <0.1       | 0.0       | <0.1      | <0.1       | <0.1       |
| <b>TAG FA 10:0</b>           | 0.1       | <0.1      | <0.1       | 0.0       | 0.1       | 0.1 ± 0.02 | 0.1 ± 0.02 |
| <b>TAG FA <i>i</i>-11:0</b>  | 0.0       | <0.1      | <0.1       | 0.0       | <0.1      | 0.1 ± 0.03 | <0.1       |
| <b>TAG FA <i>i</i>-12:0</b>  | 0.0       | <0.1      | <0.1       | 0.0       | 0.1       | 0.1 ± 0.04 | <0.1       |
| <b>TAG FA 12:0</b>           | 0.1       | <0.1      | <0.1       | 0.0       | 0.2       | 0.5 ± 0.1  | 0.3 ± 0.04 |
| <b>TAG FA <i>i</i>-13:0</b>  | 0.0       | <0.1      | <0.1       | 0.0       | <0.1      | 0.1 ± 0.1  | <0.1       |
| <b>TAG FA <i>ai</i>-13:0</b> | 0.0       | 0.0       | <0.1       | 0.0       | <0.1      | 0.1 ± 0.1  | 0.0        |
| <b>TAG FA <i>i</i>-14:0</b>  | 0.0       | <0.1      | <0.1       | 0.0       | <0.1      | 0.2 ± 0.04 | 0.1 ± 0.02 |
| <b>TAG FA 14:0</b>           | 1.6       | 0.1       | <0.1       | 0.0       | 0.7       | 8.4 ± 0.5  | 4.4 ± 0.8  |
| <b>TAG FA 14:1n-9</b>        | 0.0       | <0.1      | 0.3 ± 0.2  | 0.0       | <0.1      | 0.1 ± 0.1  | 0.1 ± 0.01 |
| <b>TAG FA 14:1n-7</b>        | 0.0       | <0.1      | <0.1       | 0.0       | 0.1       | 0.2 ± 0.1  | 0.1 ± 0.01 |
| <b>TAG FA 14:1n-5</b>        | 0.0       | <0.1      | <0.1       | 0.0       | 0.1       | 1.0 ± 0.9  | 0.5 ± 0.2  |
| <b>TAG FA <i>i</i>-15:0</b>  | 0.0       | <0.1      | <0.1       | 0.0       | <0.1      | 0.6 ± 0.1  | 0.2 ± 0.05 |
| <b>TAG FA <i>ai</i>-15:0</b> | 0.0       | <0.1      | <0.1       | 0.0       | <0.1      | 0.3 ± 0.1  | <0.1       |

|                             |      |      |            |      |      |            |            |
|-----------------------------|------|------|------------|------|------|------------|------------|
| <b>TAG FA 15:0</b>          | 0.1  | <0.1 | <0.1       | 0.0  | 0.1  | 1.3 ± 0.1  | 0.7 ± 0.1  |
| <b>TAG FA <i>i</i>-16:0</b> | 0.0  | <0.1 | <0.1       | 0.0  | <0.1 | 0.2 ± 0.1  | 0.1 ± 0.03 |
| <b>TAG FA 16:0</b>          | 23.4 | 0.2  | 0.7 ± 0.2  | 0.0  | 1.7  | 12.0 ± 0.7 | 16.7 ± 0.8 |
| <b>TAG FA 16:1n-9</b>       | 0.5  | <0.1 | 0.1 ± 0.1  | 0.0  | 0.7  | 0.8 ± 0.3  | 1.2 ± 0.1  |
| <b>TAG FA 16:1n-7</b>       | 2.3  | 0.2  | 0.4 ± 0.2  | 0.0  | 1.8  | 13.9 ± 1.5 | 8.7 ± 2.9  |
| <b>TAG FA 18:0</b>          | 10.1 | <0.1 | 0.4 ± 0.1  | 0.0  | 0.2  | 2.1 ± 0.1  | 3.8 ± 0.3  |
| <b>TAG FA 18:1n-11</b>      | 0.0  | <0.1 | 0.6 ± 0.3  | 0.0  | 1.5  | 1.0 ± 0.6  | 0.1 ± 0.1  |
| <b>TAG FA 18:1n-9</b>       | 39.0 | 0.3  | 0.9 ± 0.3  | 0.0  | 3.1  | 22.9 ± 3.4 | 46.9 ± 5.5 |
| <b>TAG FA 18:1n-7</b>       | 2.8  | <0.1 | 0.1 ± 0.03 | 0.0  | 0.3  | 2.4 ± 0.2  | 3.3 ± 0.1  |
| <b>TAG FA 18:2n-6</b>       | 19.7 | <0.1 | <0.1       | 0.0  | 0.1  | 1.4 ± 0.03 | 0.6 ± 0.1  |
| <b>TAG FA 20:1n-11</b>      | 0.0  | <0.1 | 0.1 ± 0.1  | 0.0  | 0.5  | 0.9 ± 0.4  | 0.5 ± 0.1  |
| <b>TAG FA 20:1n-9</b>       | 0.0  | 0.1  | 0.2 ± 0.2  | 0.0  | 0.8  | 3.5 ± 0.6  | 4.3 ± 0.3  |
| <b>TAG FA 20:4n-6</b>       | 0.2  | <0.1 | 0.0        | 0.0  | 0.0  | 1.1 ± 0.2  | 0.6 ± 0.2  |
| <b>TAG FA 20:5n-3</b>       | 0.0  | <0.1 | 0.0        | 0.0  | 0.0  | 2.4 ± 0.6  | 0.7 ± 0.4  |
| <b>TAG FA 22:1n-11</b>      | 0.0  | 0.1  | 0.2 ± 0.2  | 0.0  | 1.1  | 2.2 ± 1.1  | 0.3 ± 0.1  |
| <b>TAG FA 22:5n-3</b>       | 0.1  | <0.1 | <0.1       | 0.0  | <0.1 | 2.2 ± 0.3  | 0.8 ± 0.3  |
| <b>TAG FA 22:6n-3</b>       | 0.0  | <0.1 | <0.1       | 0.0  | 0.1  | 10.7 ± 2.2 | 2.5 ± 1.4  |
| <b>WE FA <i>i</i>-5:0</b>   | 0.0  | 0.0  | 0.0        | <0.1 | <0.1 | 0.0        | 0.0        |
| <b>WE FA <i>i</i>-10:0</b>  | 0.0  | 0.0  | <0.1       | <0.1 | <0.1 | 0.0        | 0.0        |

|                            |     |      |            |      |      |     |     |
|----------------------------|-----|------|------------|------|------|-----|-----|
| <b>WE FA 10:0</b>          | 0.0 | 0.2  | 0.2 ± 0.1  | 0.1  | 0.1  | 0.0 | 0.0 |
| <b>WE FA <i>i</i>-11:0</b> | 0.0 | <0.1 | <0.1       | <0.1 | <0.1 | 0.0 | 0.0 |
| <b>WE FA <i>i</i>-12:0</b> | 0.0 | <0.1 | <0.1       | <0.1 | 0.1  | 0.0 | 0.0 |
| <b>WE FA 12:0</b>          | 0.0 | 1.1  | 0.7 ± 0.1  | 0.3  | 0.4  | 0.0 | 0.0 |
| <b>WE FA <i>i</i>-14:0</b> | 0.0 | 0.1  | <0.1       | <0.1 | <0.1 | 0.0 | 0.0 |
| <b>WE FA 14:0</b>          | 0.0 | 3.5  | 3.0 ± 0.1  | 2.7  | 2.4  | 0.0 | 0.0 |
| <b>WE FA 14:1n-9</b>       | 0.0 | 0.7  | 0.2 ± 0.1  | 0.1  | 0.2  | 0.0 | 0.0 |
| <b>WE FA 14:1n-7</b>       | 0.0 | 0.8  | 0.2 ± 0.1  | 0.1  | 0.2  | 0.0 | 0.0 |
| <b>WE FA 14:1n-5</b>       | 0.0 | 1.4  | 0.6 ± 0.1  | 0.4  | 0.9  | 0.0 | 0.0 |
| <b>WE FA <i>i</i>-15:0</b> | 0.0 | 0.1  | 0.1 ± 0.02 | <0.1 | 0.2  | 0.0 | 0.0 |
| <b>WE FA 15:0</b>          | 0.0 | 0.2  | 0.2 ± 0.1  | 0.2  | 0.1  | 0.0 | 0.0 |
| <b>WE FA 16:0</b>          | 0.0 | 3.3  | 4.2 ± 1.3  | 3.4  | 1.6  | 0.0 | 0.0 |
| <b>WE FA 16:1n-11</b>      | 0.0 | 0.3  | 0.1 ± 0.1  | <0.1 | 0.4  | 0.0 | 0.0 |
| <b>WE FA 16:1n-9</b>       | 0.0 | 2.7  | 0.8 ± 0.2  | 0.8  | 1.0  | 0.0 | 0.0 |
| <b>WE FA 16:1n-7</b>       | 0.0 | 8.4  | 6.0 ± 1.5  | 5.6  | 7.4  | 0.0 | 0.0 |
| <b>WE FA 18:1n-11</b>      | 0.0 | 1.5  | 0.6 ± 0.6  | 0.0  | 1.1  | 0.0 | 0.0 |
| <b>WE FA 18:1n-9</b>       | 0.0 | 9.7  | 17.5 ± 6.0 | 26.4 | 15.3 | 0.0 | 0.0 |
| <b>WE FA 18:1n-7</b>       | 0.0 | 0.3  | 0.6 ± 0.2  | 1.1  | 1.2  | 0.0 | 0.0 |
| <b>WE FA 20:1n-11</b>      | 0.0 | 3.1  | 1.6 ± 1.1  | 0.9  | 2.0  | 0.0 | 0.0 |

|                              |     |      |            |      |      |     |     |
|------------------------------|-----|------|------------|------|------|-----|-----|
| <b>WE FA 20:1n-9</b>         | 0.0 | 3.9  | 4.8 ± 0.9  | 4.2  | 3.8  | 0.0 | 0.0 |
| <b>WE FA 22:1n-11</b>        | 0.0 | 5.3  | 4.3 ± 4.3  | 0.0  | 2.8  | 0.0 | 0.0 |
| <b>WE FAlc 14:0</b>          | 0.0 | 1.3  | 1.2 ± 0.3  | 0.7  | 1.4  | 0.0 | 0.0 |
| <b>WE FAlc <i>i</i>-15:0</b> | 0.0 | 0.2  | 0.2 ± 0.1  | 0.4  | 0.9  | 0.0 | 0.0 |
| <b>WE FAlc 15:0</b>          | 0.0 | 0.3  | 0.5 ± 0.1  | 0.4  | 0.4  | 0.0 | 0.0 |
| <b>WE FAlc <i>i</i>-16:0</b> | 0.0 | 0.1  | 0.3 ± 0.2  | 1.1  | 2.8  | 0.0 | 0.0 |
| <b>WE FAlc 16:0</b>          | 0.0 | 9.7  | 14.2 ± 1.4 | 13.5 | 11.4 | 0.0 | 0.0 |
| <b>WE FAlc 16:1n-7</b>       | 0.0 | 5.5  | 2.5 ± 0.5  | 1.9  | 3.3  | 0.0 | 0.0 |
| <b>WE FAlc 18:0</b>          | 0.0 | 1.6  | 2.5 ± 0.4  | 3.7  | 1.4  | 0.0 | 0.0 |
| <b>WE FAlc 18:1n-9</b>       | 0.0 | 25.0 | 23.1 ± 1.7 | 23.4 | 16.1 | 0.0 | 0.0 |
| <b>WE FAlc 18:1n-7</b>       | 0.0 | 0.0  | 0.0        | 2.5  | 2.6  | 0.0 | 0.0 |
| <b>WE FAlc 20:1n-9</b>       | 0.0 | 4.3  | 2.0 ± 1.4  | 0.1  | 0.9  | 0.0 | 0.0 |

\*The TAG FAs of one *K. breviceps* blubber sample could not be quantified. Therefore, the average Kb TAG FAs represent two individual animals, while the WE FAs and WE FAlcs represent three individual animals.

**Table S3. Percentages (mol% of total FA/FAIc profile, including both TAG and WE lipid components) of major FAs and FAIcs constituting IMFBS from odontocetes examined in this study.** Components that did not constitute more than 1.0 mol% of any one sample are excluded. For specimens with  $n > 1$ , the mean with standard deviation is reported.

| <b>Lipid Component</b>       | <b>Pm</b> | <b>Kb</b>  | <b>Md</b> | <b>Me</b> | <b>Sf*</b> | <b>Gm</b>  |
|------------------------------|-----------|------------|-----------|-----------|------------|------------|
| <b>TAG FA <i>i</i>-5:0</b>   | <0.1      | 0.0        | 0.2       | 1.0       | 51.7 ± 2.2 | 53.4 ± 1.8 |
| <b>TAG FA <i>i</i>-10:0</b>  | 0.0       | 0.1 ± 0.1  | 4.6       | 4.9       | <0.1       | <0.1       |
| <b>TAG FA 10:0</b>           | 0.1       | 1.6 ± 1.0  | 3.1       | 6.0       | 0.1 ± 0.01 | <0.1       |
| <b>TAG FA <i>i</i>-11:0</b>  | 0.0       | 0.1 ± 0.03 | 1.4       | 3.8       | 0.5 ± 0.1  | 0.4 ± 0.1  |
| <b>TAG FA <i>i</i>-12:0</b>  | <0.1      | 0.5 ± 0.4  | 11.4      | 12.9      | 0.4 ± 0.05 | 0.4 ± 0.1  |
| <b>TAG FA 12:0</b>           | 1.1       | 7.6 ± 5.0  | 2.5       | 10.3      | 0.3 ± 0.04 | 0.1 ± 0.01 |
| <b>TAG FA <i>i</i>-13:0</b>  | <0.1      | 0.1 ± 0.1  | 0.4       | 2.4       | 0.9 ± 0.1  | 0.9 ± 0.2  |
| <b>TAG FA <i>ai</i>-13:0</b> | 0.0       | 0.1 ± 0.1  | 0.5       | 0.6       | 0.2 ± 0.02 | <0.1       |
| <b>TAG FA <i>i</i>-14:0</b>  | <0.1      | 0.6 ± 0.5  | 1.3       | 4.4       | 2.2 ± 0.2  | 3.7 ± 0.7  |
| <b>TAG FA 14:0</b>           | 3.4       | 11.8 ± 3.8 | 0.2       | 3.0       | 6.3 ± 0.4  | 2.6 ± 0.2  |
| <b>TAG FA 14:1n-9</b>        | 0.5       | 3.3 ± 2.0  | 0.1       | 1.0       | <0.1       | <0.1       |
| <b>TAG FA 14:1n-7</b>        | 0.3       | 1.0 ± 0.5  | 0.1       | 0.5       | 0.1 ± 0.01 | 0.1 ± 0.02 |
| <b>TAG FA 14:1n-5</b>        | 0.3       | 0.4 ± 0.4  | <0.1      | <0.1      | 0.4 ± 0.1  | 0.5 ± 0.1  |
| <b>TAG FA <i>i</i>-15:0</b>  | <0.1      | 0.3 ± 0.1  | <0.1      | 0.6       | 9.6 ± 0.9  | 8.6 ± 1.4  |
| <b>TAG FA <i>ai</i>-15:0</b> | <0.1      | 0.1 ± 0.05 | <0.1      | 0.2       | 1.2 ± 0.1  | 0.3 ± 0.1  |

|                             |      |             |      |      |            |            |
|-----------------------------|------|-------------|------|------|------------|------------|
| <b>TAG FA 15:0</b>          | 0.1  | 0.7 ± 0.1   | <0.1 | 0.1  | 0.8 ± 0.1  | 0.4 ± 0.1  |
| <b>TAG FA <i>i</i>-16:0</b> | <0.1 | 0.4 ± 0.2   | 0.2  | 0.9  | 1.5 ± 0.1  | 2.3 ± 0.5  |
| <b>TAG FA 16:0</b>          | 4.1  | 15.5 ± 2.3  | 0.2  | 2.5  | 7.1 ± 0.7  | 2.7 ± 0.1  |
| <b>TAG FA 16:1n-9</b>       | 2.1  | 6.3 ± 2.0   | 0.1  | 2.1  | 0.6 ± 0.1  | 0.5 ± 0.1  |
| <b>TAG FA 16:1n-7</b>       | 2.7  | 8.0 ± 1.0   | <0.1 | 1.0  | 4.5 ± 0.8  | 4.3 ± 0.5  |
| <b>TAG FA 18:0</b>          | 0.4  | 1.2 ± 0.8   | <0.1 | 0.5  | 0.3 ± 0.1  | 0.1 ± 0.01 |
| <b>TAG FA 18:1n-11</b>      | 0.9  | 1.2 ± 1.0   | 0.0  | 0.9  | 0.2 ± 0.04 | <0.1       |
| <b>TAG FA 18:1n-9</b>       | 4.1  | 18.7 ± 10.2 | 0.1  | 2.9  | 3.9 ± 0.2  | 4.3 ± 1.0  |
| <b>TAG FA 18:1n-7</b>       | 0.2  | 1.2 ± 0.8   | <0.1 | 0.4  | 0.4 ± 0.01 | 0.2 ± 0.1  |
| <b>TAG FA 18:2n-6</b>       | 0.1  | 0.4 ± 0.2   | 0.0  | 0.1  | 0.2 ± 0.2  | <0.1       |
| <b>TAG FA 20:1n-11</b>      | 0.2  | 0.4 ± 0.3   | 0.0  | 0.3  | <0.1       | <0.1       |
| <b>TAG FA 20:1n-9</b>       | 0.4  | 1.4 ± 1.0   | 0.0  | 0.9  | 0.1 ± 0.01 | 0.1 ± 0.1  |
| <b>TAG FA 20:4n-6</b>       | 0.0  | 0.1 ± 0.1   | 0.0  | <0.1 | <0.1       | <0.1       |
| <b>TAG FA 20:5n-3</b>       | 0.0  | 0.1 ± 0.1   | 0.0  | <0.1 | <0.1       | <0.1       |
| <b>TAG FA 22:1n-11</b>      | 1.0  | 0.7 ± 0.7   | 0.0  | 0.6  | 0.1 ± 0.03 | 0.1 ± 0.1  |
| <b>TAG FA 22:5n-3</b>       | <0.1 | 0.1 ± 0.1   | 0.0  | <0.1 | <0.1       | <0.1       |
| <b>TAG FA 22:6n-3</b>       | <0.1 | 0.3 ± 0.3   | 0.0  | 0.1  | 0.1 ± 0.01 | <0.1       |
| <b>WE FA <i>i</i>-5:0</b>   | 0.0  | <0.1        | <0.1 | 0.0  | NA         | 4.5 ± 1.6  |
| <b>WE FA <i>i</i>-10:0</b>  | <0.1 | 0.1 ± 0.1   | 4.9  | 0.9  | NA         | <0.1       |



|                            |      |            |      |      |    |            |
|----------------------------|------|------------|------|------|----|------------|
| <b>WE FA 10:0</b>          | 0.4  | 0.4 ± 0.3  | 3.6  | 1.2  | NA | <0.1       |
| <b>WE FA <i>i</i>-11:0</b> | <0.1 | <0.1       | 1.6  | 0.7  | NA | <0.1       |
| <b>WE FA <i>i</i>-12:0</b> | 0.1  | 0.3 ± 0.3  | 15.9 | 3.8  | NA | <0.1       |
| <b>WE FA 12:0</b>          | 4.3  | 1.9 ± 1.4  | 4.0  | 3.5  | NA | <0.1       |
| <b>WE FA <i>i</i>-14:0</b> | <0.1 | 0.1 ± 0.1  | 2.3  | 1.4  | NA | <0.1       |
| <b>WE FA 14:0</b>          | 5.6  | 0.6 ± 0.3  | 0.3  | 0.4  | NA | <0.1       |
| <b>WE FA 14:1n-9</b>       | 2.5  | 0.7 ± 0.5  | 0.2  | 0.0  | NA | <0.1       |
| <b>WE FA 14:1n-7</b>       | 1.0  | 0.1 ± 0.1  | 0.1  | 0.1  | NA | <0.1       |
| <b>WE FA 14:1n-5</b>       | 0.4  | <0.1       | <0.1 | <0.1 | NA | <0.1       |
| <b>WE FA <i>i</i>-15:0</b> | 0.1  | <0.1       | 0.1  | 0.3  | NA | 0.2 ± 0.2  |
| <b>WE FA 15:0</b>          | 0.2  | <0.1       | <0.1 | <0.1 | NA | 0.4 ± 0.3  |
| <b>WE FA 16:0</b>          | 4.8  | 0.3 ± 0.1  | 0.2  | 0.3  | NA | 0.8 ± 0.1  |
| <b>WE FA 16:1n-11</b>      | 1.0  | 0.1 ± 0.05 | 0.0  | 0.1  | NA | 0.1 ± 0.01 |
| <b>WE FA 16:1n-9</b>       | 3.1  | 0.1 ± 0.1  | 0.2  | 0.0  | NA | <0.1       |
| <b>WE FA 16:1n-7</b>       | 4.4  | 0.3 ± 0.1  | <0.1 | 0.3  | NA | 0.3 ± 0.1  |
| <b>WE FA 18:1n-11</b>      | 1.1  | <0.1       | <0.1 | 0.1  | NA | <0.1       |
| <b>WE FA 18:1n-9</b>       | 5.8  | 0.8 ± 0.5  | 0.1  | 0.6  | NA | 0.1 ± 0.05 |
| <b>WE FA 18:1n-7</b>       | 0.3  | <0.1       | <0.1 | 0.1  | NA | <0.1       |
| <b>WE FA 20:1n-11</b>      | 0.0  | <0.1       | <0.1 | 0.1  | NA | <0.1       |

|                              |      |            |      |      |    |            |
|------------------------------|------|------------|------|------|----|------------|
| <b>WE FA 20:1n-9</b>         | 0.9  | 0.1 ± 0.05 | <0.1 | 0.2  | NA | <0.1       |
| <b>WE FA 22:1n-11</b>        | 1.0  | <0.1       | 0.0  | 0.1  | NA | 0.0        |
| <b>WE FAlc 14:0</b>          | 1.6  | 0.2 ± 0.1  | 0.9  | 0.6  | NA | 0.1 ± 0.02 |
| <b>WE FAlc <i>i</i>-15:0</b> | 0.1  | 0.0        | 1.2  | 0.9  | NA | 1.6 ± 0.7  |
| <b>WE FAlc 15:0</b>          | 0.5  | 0.2 ± 0.1  | 0.7  | 0.3  | NA | 0.1 ± 0.02 |
| <b>WE FAlc <i>i</i>-16:0</b> | 2.3  | 0.6 ± 0.5  | 22.8 | 7.8  | NA | 2.6 ± 0.6  |
| <b>WE FAlc 16:0</b>          | 16.1 | 3.6 ± 1.6  | 7.4  | 5.4  | NA | 1.3 ± 0.5  |
| <b>WE FAlc 16:1n-7</b>       | 2.4  | 0.2 ± 0.1  | 0.3  | <0.1 | NA | 0.2 ± 0.1  |
| <b>WE FAlc 18:0</b>          | 1.2  | 0.3 ± 0.1  | 0.5  | 0.2  | NA | 0.1 ± 0.03 |
| <b>WE FAlc 18:1n-9</b>       | 10.7 | 1.4 ± 0.3  | 1.0  | 0.7  | NA | 0.5 ± 0.2  |
| <b>WE FAlc 18:1n-7</b>       | 2.2  | 0.0        | 0.2  | 0.0  | NA | 0.0        |
| <b>WE FAlc 20:1n-9</b>       | 0.4  | <0.1       | 0.0  | <0.1 | NA | <0.1       |

\*The WE components of all three *S. frontalis* IMFB samples could not be quantified. Therefore, only the average TAG FAs are reported.

**Table S4. Percentages (mol% of total FA/FAIc profile, including both TAG and WE lipid components) of major FAs and FAIcs constituting EMFBs from odontocetes examined in this study.** Components that did not constitute more than 1.0 mol% of any one sample are excluded. For specimens with  $n > 1$ , the mean with standard deviation is reported.

| Lipid Component        | Pm   | Kb        | Md   | Me   | Mm*  | Sf         | Gm         |
|------------------------|------|-----------|------|------|------|------------|------------|
| TAG FA <i>i</i> -5:0   | <0.1 | 0.1 ± 0.1 | 0.5  | 1.1  | 48.7 | 53.3 ± 2.5 | 43.4 ± 3.4 |
| TAG FA <i>i</i> -10:0  | 0.0  | 0.6 ± 0.5 | 4.6  | 9.0  | 0.1  | <0.1       | <0.1       |
| TAG FA 10:0            | <0.1 | 2.6 ± 1.8 | 6.5  | 8.1  | 0.4  | <0.1       | <0.1       |
| TAG FA <i>i</i> -11:0  | 0.0  | 0.2 ± 0.1 | 2.3  | 7.6  | 1.8  | 0.4 ± 0.1  | 0.2 ± 0.03 |
| TAG FA <i>i</i> -12:0  | <0.1 | 1.3 ± 1.1 | 21.0 | 22.7 | 0.8  | 0.1 ± 0.1  | 0.1 ± 0.01 |
| TAG FA 12:0            | 0.1  | 9.3 ± 7.9 | 9.0  | 11.6 | 1.8  | 0.2 ± 0.1  | <0.1       |
| TAG FA <i>i</i> -13:0  | 0.0  | 0.1 ± 0.1 | 1.5  | 4.2  | 2.9  | 0.8 ± 0.1  | 0.6 ± 0.1  |
| TAG FA <i>ai</i> -13:0 | 0.0  | 0.1 ± 0.1 | 1.3  | 1.2  | 0.2  | 0.1 ± 0.04 | <0.1       |
| TAG FA <i>i</i> -14:0  | <0.1 | 1.3 ± 1.0 | 3.4  | 4.4  | 1.6  | 1.8 ± 0.2  | 3.4 ± 0.5  |
| TAG FA 14:0            | 0.2  | 6.5 ± 5.9 | 0.7  | 0.7  | 5.6  | 4.0 ± 0.7  | 1.4 ± 0.2  |
| TAG FA 14:1n-9         | <0.1 | 2.1 ± 1.7 | 0.7  | 0.3  | 0.5  | <0.1       | <0.1       |
| TAG FA 14:1n-7         | <0.1 | 0.6 ± 0.5 | 0.3  | 0.2  | 0.7  | 0.1 ± 0.02 | <0.1       |
| TAG FA 14:1n-5         | <0.1 | 0.4 ± 0.3 | <0.1 | 0.1  | 0.4  | 0.2 ± 0.1  | 0.1 ± 0.01 |
| TAG FA <i>i</i> -15:0  | <0.1 | 0.2 ± 0.1 | 0.1  | 0.3  | 8.3  | 11.1 ± 0.5 | 10 ± 1.4   |
| TAG FA <i>ai</i> -15:0 | <0.1 | 0.1 ± 0.1 | 0.1  | 0.1  | 0.4  | 0.9 ± 0.1  | 0.2 ± 0.03 |

|                             |      |           |      |      |     |            |            |
|-----------------------------|------|-----------|------|------|-----|------------|------------|
| <b>TAG FA 15:0</b>          | <0.1 | 0.3 ± 0.2 | <0.1 | 0.1  | 0.4 | 0.4 ± 0.1  | 0.2 ± 0.03 |
| <b>TAG FA <i>i</i>-16:0</b> | 0.0  | 0.6 ± 0.5 | 0.3  | 0.3  | 1.2 | 0.9 ± 0.1  | 1.7 ± 0.1  |
| <b>TAG FA 16:0</b>          | 0.2  | 5.0 ± 4.4 | 0.5  | 0.6  | 5.1 | 3.2 ± 0.5  | 1.2 ± 0.3  |
| <b>TAG FA 16:1n-9</b>       | 0.1  | 2.3 ± 1.8 | 0.7  | 0.3  | 1.4 | 0.2 ± 0.1  | 0.1 ± 0.03 |
| <b>TAG FA 16:1n-7</b>       | 0.2  | 2.4 ± 2.3 | 0.1  | 0.1  | 9.3 | 2.0 ± 0.6  | 0.8 ± 0.2  |
| <b>TAG FA 18:0</b>          | <0.1 | 0.1 ± 0.1 | 0.1  | 0.1  | 0.1 | 0.1 ± 0.05 | <0.1       |
| <b>TAG FA 18:1n-11</b>      | 0.1  | 0.3 ± 0.3 | <0.1 | <0.1 | 0.8 | <0.1       | <0.1       |
| <b>TAG FA 18:1n-9</b>       | 0.2  | 3.2 ± 2.9 | 0.5  | 0.1  | 3.8 | 1.2 ± 0.8  | 0.4 ± 0.2  |
| <b>TAG FA 18:1n-7</b>       | <0.1 | 0.2 ± 0.2 | 0.1  | 0.2  | 0.7 | 0.1 ± 0.1  | <0.1       |
| <b>TAG FA 18:2n-6</b>       | <0.1 | 0.1 ± 0.1 | 0.0  | 0.0  | 0.1 | 0.0        | <0.1       |
| <b>TAG FA 20:1n-11</b>      | <0.1 | 0.1 ± 0.1 | 0.0  | <0.1 | 0.2 | 0.0        | 0.0        |
| <b>TAG FA 20:1n-9</b>       | <0.1 | 0.3 ± 0.3 | 0.1  | 0.1  | 0.6 | <0.1       | 0.0        |
| <b>TAG FA 20:4n-6</b>       | 0.0  | <0.1      | 0.0  | 0.0  | 0.2 | 0.0        | <0.1       |
| <b>TAG FA 20:5n-3</b>       | <0.1 | <0.1      | 0.0  | 0.0  | 0.2 | <0.1       | 0.0        |
| <b>TAG FA 22:1n-11</b>      | 0.1  | 0.4 ± 0.6 | 0.0  | 0.1  | 0.3 | 0.4 ± 0.3  | 0.0        |
| <b>TAG FA 22:5n-3</b>       | <0.1 | <0.1      | 0.0  | 0.0  | 0.1 | <0.1       | 0.0        |
| <b>TAG FA 22:6n-3</b>       | <0.1 | <0.1      | 0.0  | 0.0  | 0.1 | 0.1 ± 0.1  | 0.0        |
| <b>WE FA <i>i</i>-5:0</b>   | 0.1  | 0.0       | 0.0  | <0.1 | NA  | 6.1 ± 2.9  | 11.0 ± 1.4 |
| <b>WE FA <i>i</i>-10:0</b>  | <0.1 | 1.0 ± 0.8 | 1.4  | 1.0  | NA  | <0.1       | <0.1       |
| <b>WE FA 10:0</b>           | 0.2  | 4.3 ± 3.7 | 1.8  | 1.1  | NA  | <0.1       | <0.1       |

|                            |      |            |      |      |    |            |            |
|----------------------------|------|------------|------|------|----|------------|------------|
| <b>WE FA <i>i</i>-11:0</b> | <0.1 | 0.2 ± 0.1  | 0.7  | 0.8  | NA | 0.1 ± 0.04 | 0.1 ± 0.05 |
| <b>WE FA <i>i</i>-12:0</b> | 0.1  | 1.7 ± 1.3  | 8.3  | 4.4  | NA | <0.1       | 0.1 ± 0.02 |
| <b>WE FA 12:0</b>          | 5.1  | 10.0 ± 4.6 | 4.1  | 2.8  | NA | <0.1       | 0.1 ± 0.02 |
| <b>WE FA <i>i</i>-14:0</b> | 0.1  | 0.5 ± 0.3  | 1.7  | 1.0  | NA | <0.1       | <0.1       |
| <b>WE FA 14:0</b>          | 8.6  | 2.3 ± 2.3  | 0.3  | 0.2  | NA | <0.1       | 0.1 ± 0.03 |
| <b>WE FA 14:1n-9</b>       | 2.7  | 2.9 ± 1.9  | 0.4  | 0.1  | NA | <0.1       | <0.1       |
| <b>WE FA 14:1n-7</b>       | 1.4  | 0.1 ± 0.1  | 0.1  | <0.1 | NA | <0.1       | <0.1       |
| <b>WE FA 14:1n-5</b>       | 0.8  | 0.1 ± 0.1  | <0.1 | <0.1 | NA | 0.1 ± 0.04 | 0.1 ± 0.05 |
| <b>WE FA <i>i</i>-15:0</b> | 0.1  | 0.2 ± 0.2  | 0.1  | 0.1  | NA | 0.4 ± 0.3  | 0.6 ± 0.6  |
| <b>WE FA 15:0</b>          | 0.2  | <0.1       | <0.1 | <0.1 | NA | 0.1 ± 0.04 | 1.9 ± 1.5  |
| <b>WE FA 16:0</b>          | 4.7  | 0.6 ± 0.5  | 0.1  | 0.1  | NA | 0.6 ± 0.5  | 2.6 ± 0.9  |
| <b>WE FA 16:1n-11</b>      | 1.9  | 0.2 ± 0.2  | 0.0  | <0.1 | NA | 0.1 ± 0.03 | 0.1 ± 0.03 |
| <b>WE FA 16:1n-9</b>       | 4.7  | 0.3 ± 0.3  | 0.2  | <0.1 | NA | 0.1 ± 0.04 | <0.1       |
| <b>WE FA 16:1n-7</b>       | 5.9  | 0.5 ± 0.2  | <0.1 | <0.1 | NA | 0.7 ± 0.5  | 0.9 ± 0.2  |
| <b>WE FA 18:1n-11</b>      | 1.7  | 0.1 ± 0.1  | <0.1 | <0.1 | NA | <0.1       | <0.1       |
| <b>WE FA 18:1n-9</b>       | 6.2  | 0.8 ± 0.5  | 0.2  | <0.1 | NA | 0.1 ± 0.1  | 0.2 ± 0.02 |
| <b>WE FA 18:1n-7</b>       | 0.3  | <0.1       | <0.1 | <0.1 | NA | <0.1       | <0.1       |
| <b>WE FA 20:1n-11</b>      | 0.7  | <0.1       | <0.1 | <0.1 | NA | <0.1       | <0.1       |
| <b>WE FA 20:1n-9</b>       | 1.2  | 0.1 ± 0.1  | 0.0  | <0.1 | NA | <0.1       | <0.1       |
| <b>WE FA 22:1n-11</b>      | 1.4  | 0.1 ± 0.1  | <0.1 | <0.1 | NA | <0.1       | <0.1       |

|                              |      |            |      |     |    |            |            |
|------------------------------|------|------------|------|-----|----|------------|------------|
| <b>WE FAlc 14:0</b>          | 2.5  | 1.6 ± 1.1  | 1.0  | 0.5 | NA | 0.1 ± 0.02 | 0.2 ± 0.04 |
| <b>WE FAlc <i>i</i>-15:0</b> | 0.2  | 0.3 ± 0.2  | 0.9  | 1.0 | NA | 1.8 ± 0.8  | 5.7 ± 1.1  |
| <b>WE FAlc 15:0</b>          | 0.6  | 0.8 ± 0.4  | 0.5  | 0.2 | NA | 0.2 ± 0.1  | 0.3 ± 0.1  |
| <b>WE FAlc <i>i</i>-16:0</b> | 0.5  | 4.8 ± 3.3  | 10.7 | 7.3 | NA | 2.5 ± 1.0  | 6.7 ± 1.6  |
| <b>WE FAlc 16:0</b>          | 19.2 | 14.9 ± 9.8 | 6.2  | 3.1 | NA | 2.7 ± 0.7  | 2.9 ± 0.5  |
| <b>WE FAlc 16:1n-7</b>       | 4.0  | 0.7 ± 0.5  | 0.2  | 0.1 | NA | 0.1 ± 0.01 | 0.1 ± 0.1  |
| <b>WE FAlc 18:0</b>          | 1.5  | 0.9 ± 0.8  | 0.4  | 0.1 | NA | 0.2 ± 0.02 | 0.2 ± 0.1  |
| <b>WE FAlc 18:1n-9</b>       | 18.4 | 4.1 ± 3.4  | 1.0  | 0.2 | NA | 0.5 ± 0.03 | 1.0 ± 0.2  |
| <b>WE FAlc 18:1n-7</b>       | 0.0  | 0.3 ± 0.2  | 0.2  | 0.0 | NA | 0.2 ± 0.02 | 0.1 ± 0.1  |
| <b>WE FAlc 20:1n-9</b>       | 0.8  | 0.1 ± 0.1  | <0.1 | 0.0 | NA | <0.1       | 0.1 ± 0.03 |

\*The WE components of *M. monoceros* EMFB could not be quantified. Therefore, only the average TAG FAs are reported.
